# Supplementary material for: Clay-Coated Meshes with Superhydrophilicity and Underwater Superoleophobicity for Highly Efficient Oil/Water Separation
Source: MDPI journal article supplement (doi:10.3390/ma16124396), 2023-06-15
Supplement: s1 [file s1]

Supplementary Information for

## **Clay-Coated Meshes with Superhydrophilicity and Underwater Superoleophobicity for Highly Efficient Oil/Water Separation**

Shaolin Yang <sup>1</sup>, Cheng Zhen <sup>1</sup>, Fangfang Li <sup>1</sup>, Panpan Fu <sup>1</sup>, Maohui Li <sup>2,\*</sup>, Youjun Lu <sup>2</sup>, Zhilin Sheng <sup>1</sup>

<sup>1</sup> School of Materials Science and Engineering, Ningxia Research Center of Silicon Target and Silicon-Carbon Negative Materials Engineering Technology, North Minzu University, Yinchuan 750021, China

<sup>2</sup> School of Materials Science and Engineering, National and Local Joint Engineering Research Center of Advanced Carbon-Based Ceramics Preparation Technology, North Minzu University, Yinchuan 750021, China

\* Correspondence: [lmnlmb@nmu.edu.cn](mailto:lmnlmb@nmu.edu.cn)

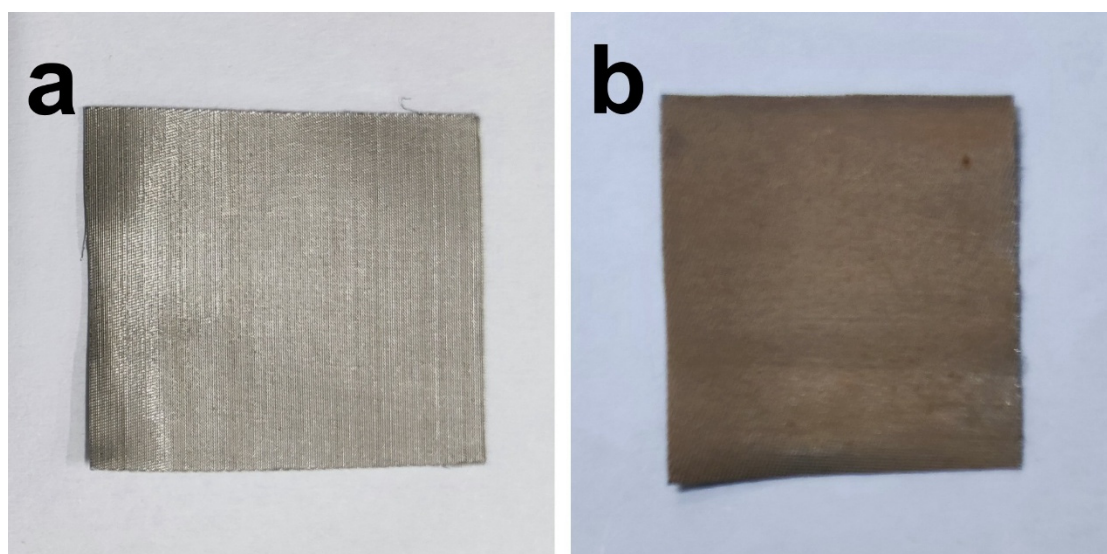

**Figure S1.** photographs of bare SSM (a) and CCM (b).

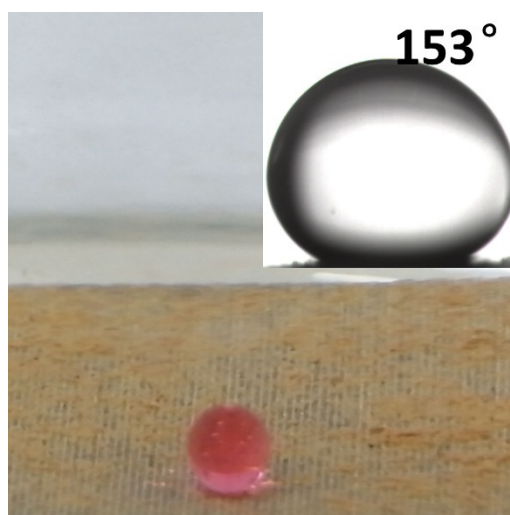

**Figure S2.** chlorobenzene droplets on the CCM under water for several days.

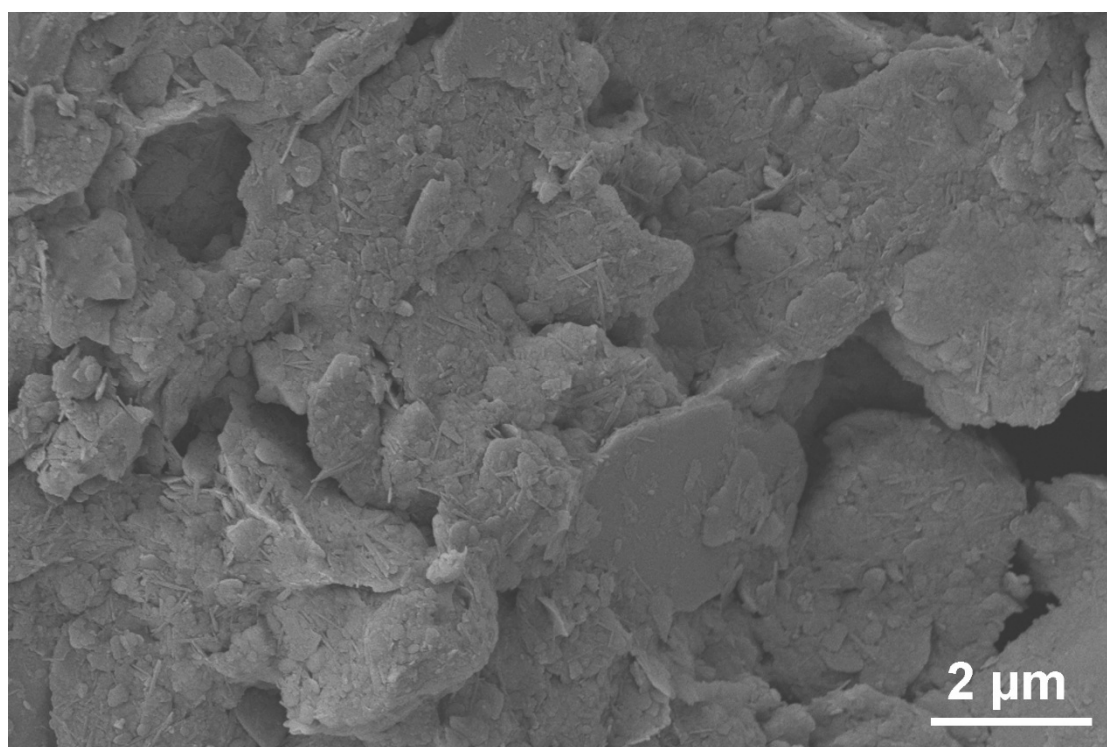

**Figure S3.** High magnification SEM image of the CCM.

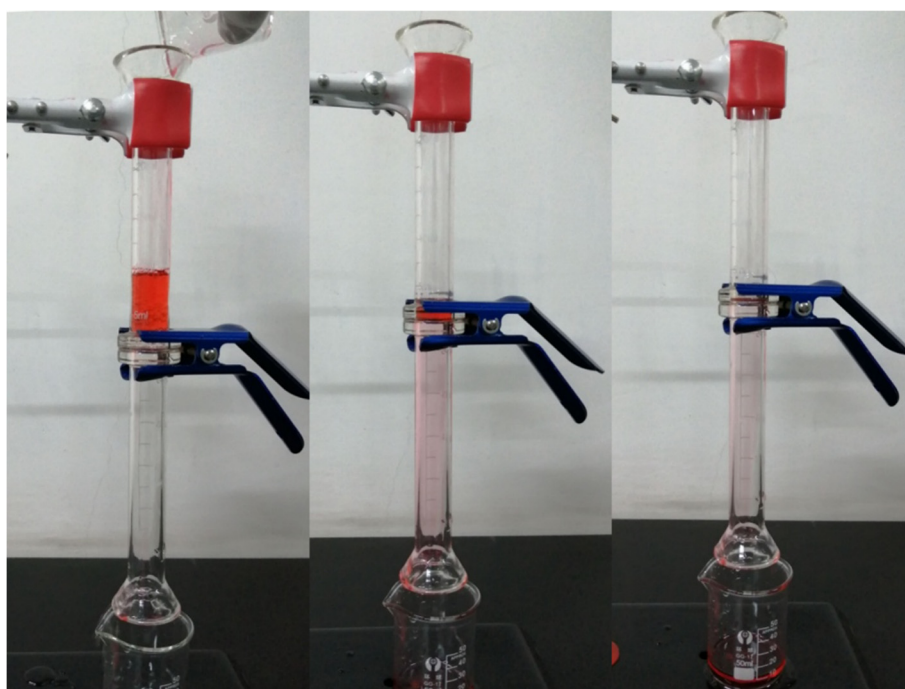

**Figure S4.** Separation process oil/water mixture with the bare SSM.

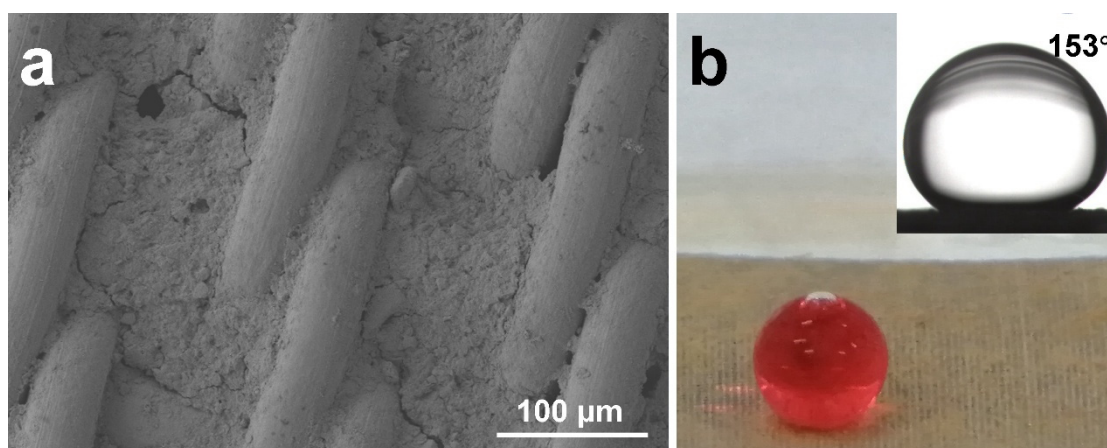

**Figure S5.** SEM (a) and underwater superoleophobicity of the CCM after it was repeated used for 30 cycles (b).
